# Supplementary material for: MnCo2O4film composed of nanoplates: synthesis, characterization and its superior catalytic performance in the hydrolytic dehydrogenation of ammonia borane
Source: Royal Society of Chemistry journal article supplement (doi:10.1039/c7cy01120b), 2017-01-01
Supplement: c7cy01120b1.pdf [file c7cy01120b1.pdf]

# MnCo<sub>2</sub>O<sub>4</sub> Film Composed of Nanoplates: Synthesis, Characterization and Its Superior Catalytic Performance in the Hydrolytic Dehydrogenation of Ammonia Borane

Quanbing Liu,<sup>a</sup> Shengjie Zhang,<sup>a</sup> Jinyun Liao,<sup>b</sup> Xuemiao Huang,<sup>b</sup> Yuying Zheng <sup>\*a</sup> Hao Li<sup>\*b</sup>

<sup>a</sup> School of Chemical Engineering and Light Industry, Guangdong University of Technology, Guangzhou 510006, China. E-mail: yyz74@gdut.edu.cn (Y. Zheng)

<sup>b</sup> School of chemistry and Materials Engineering, Huizhou University, Huizhou 516007, China. E-mail: lihao180@126.com (H. Li). Fax: +86-752-2527229 Tel: +86-752-2527229.

## Electronic Supporting Information

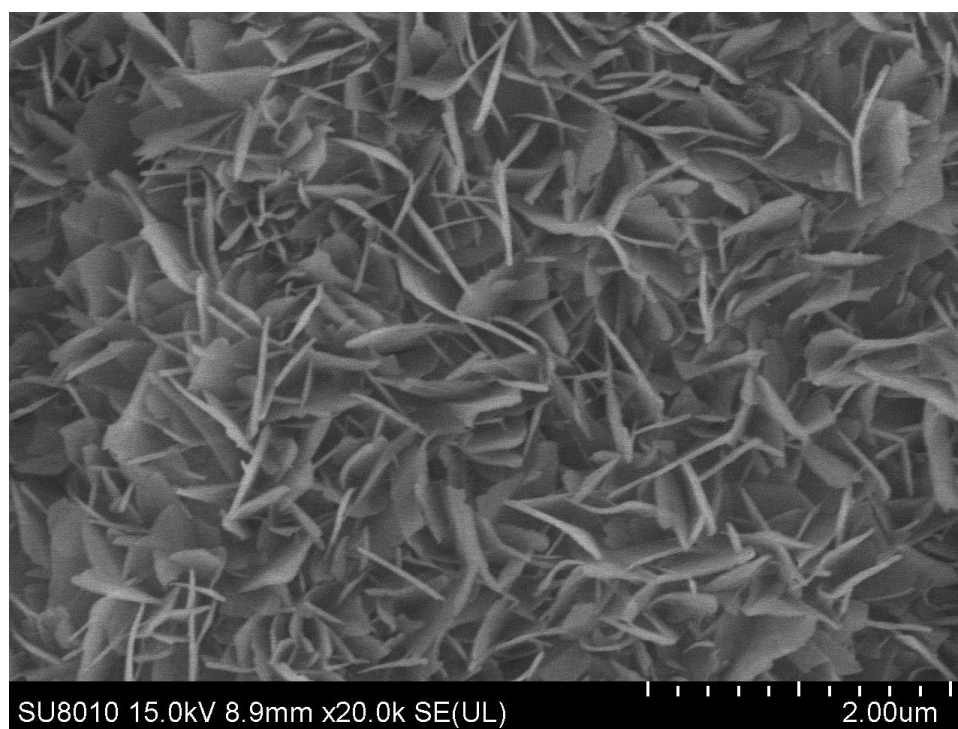

Figure S1 SEM image of the other side of MnCo<sub>2</sub>O<sub>4</sub> film.

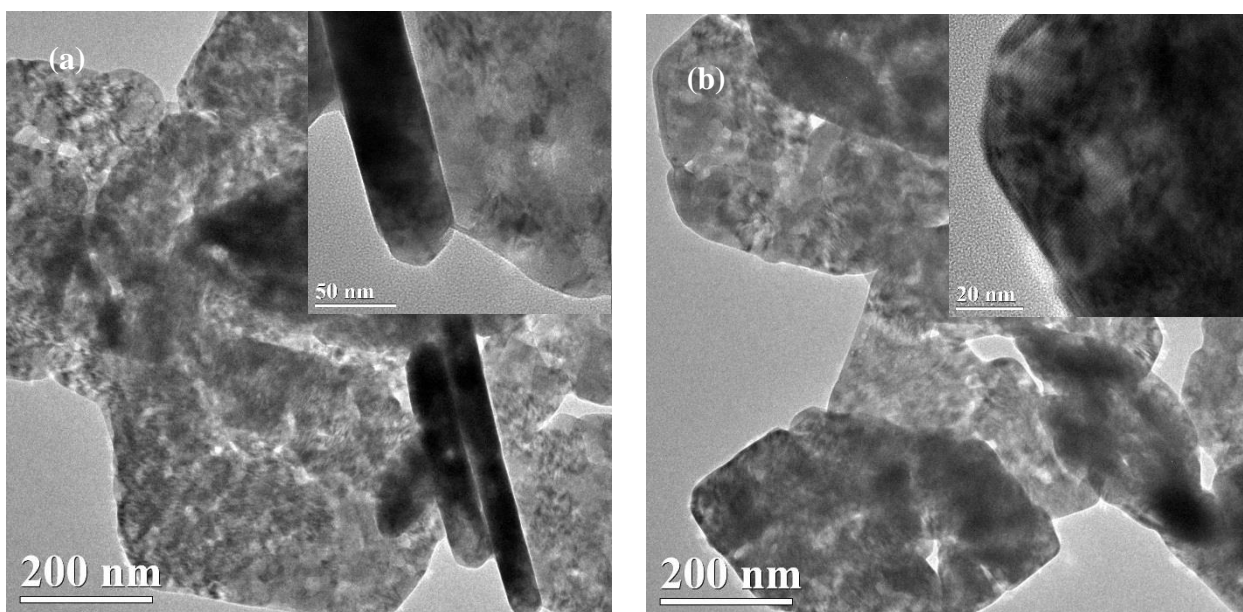

Figure S2 TEM images of  $\text{MnCo}_2\text{O}_4$  nanoplates on the surface of film before (a) and after (b) the catalytic reaction.

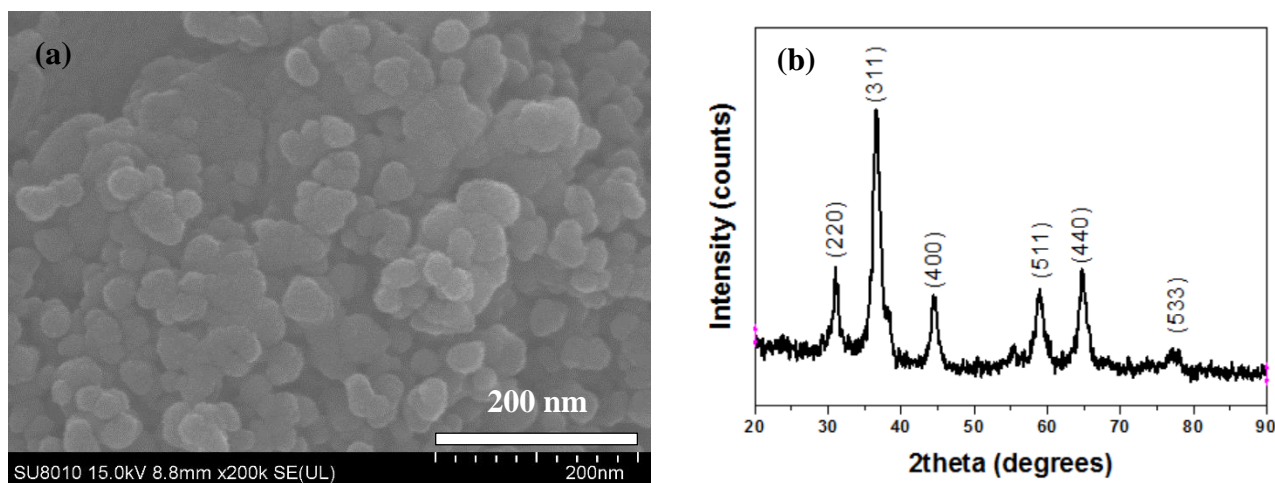

Figure S3 SEM image (a) and the XRD pattern (b) of the  $\text{MnCo}_2\text{O}_4$  nanoparticles used as a reference.

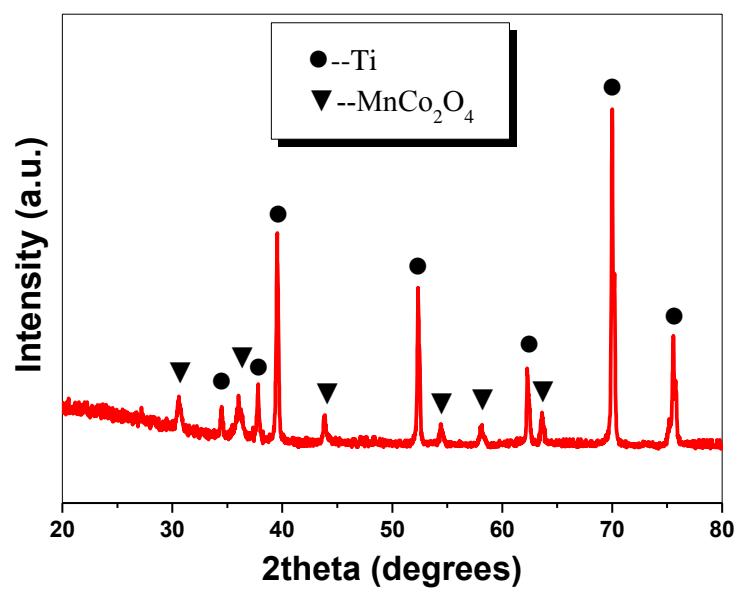

Figure S4 XRD pattern (b) of the MnCo<sub>2</sub>O<sub>4</sub> film after catalytic reaction.
